# Supplementary material
Source: publisher figshare collection journal article supplement (https://frontiersin.figshare.com/ndownloader/files/22104597)
Supplement: Supplementary file 1 [file 22104597]

## Supplementary Material

# *Generalized Synchronization between ENSO and hydrological variables in Colombia: A recurrence quantification approach*

**Table S1.** XM river flow gauges, record length 1976–2015

| ID | Latitude | Longitude | River           | Dam            | Central     |
|----|----------|-----------|-----------------|----------------|-------------|
| 1  | 3.53     | -76.87    | Alto Anchicaya  | Alto Anchicaya | Alban       |
| 2  | 4.90     | -73.30    | Bata            | Esmeralda      | Chivor      |
| 3  | 2.71     | -75.43    | Betania         | Betania        | Betania     |
| 4  | 4.54     | -74.26    | Bogota          | Agr.Bogota     | Pagua       |
| 5  | 3.88     | -76.56    | Calima          | Calima         | Calima      |
| 6  | 2.94     | -76.71    | Cauca-Salvajina | Salvajina      | Salvajina   |
| 7  | 4.57     | -73.70    | Chuza           | Agr.Bogota     | Pagua       |
| 8  | 6.51     | -75.45    | Grande          | Riogrande      | La Tasajera |
| 9  | 6.78     | -75.25    | Guadalupe       | Troneras       | Guatiron    |
| 10 | 6.29     | -74.94    | Guatape         | Playas         | Playas      |
| 11 | 4.73     | -73.48    | Guavio          | Guavio         | Guavio      |
| 12 | 5.56     | -74.89    | Miel I          | Amani          | Miel I      |
| 13 | 6.32     | -75.17    | Nare            | Peñol          | Guatapé     |
| 14 | 6.81     | -75.15    | Porce II        | Porce II       | Porce II    |
| 15 | 3.76     | -74.89    | Prado           | Prado          | Prado       |
| 16 | 6.21     | -74.84    | San Carlos      | Punchina       | San Carlos  |
| 17 | 6.39     | -74.99    | San Lorenzo     | San Lorenzo    | Joaguas     |
| 18 | 6.78     | -75.32    | Tenche          | Miraflores     | Guatrón     |

**Table S2.** IDEAM river flows gauges, record length 1976–2013.

| ID | IDEAM code | Name             | River     | Latitude | Longitude |
|----|------------|------------------|-----------|----------|-----------|
| 0  | 1107701    | Bellavista       | Atrato    | 6.57     | -76.57    |
| 1  | 1105702    | San Padu Antonio | Atrato    | 6.28     | -76.77    |
| 2  | 2306706    | Tobia            | Negro     | 5.13     | -74.45    |
| 3  | 2308715    | Pte Real         | Negro     | 6.15     | -75.38    |
| 4  | 2205704    | Palmalarga       | Saldana   | 3.68     | -75.33    |
| 5  | 2619703    | Remolino El      | San Juan  | 5.87     | -75.92    |
| 6  | 2119703    | Playa La         | Sumapaz   | 4.2      | -74.5     |
| 7  | 2903702    | Calamar          | Magdalena | 10.25    | -74.91    |

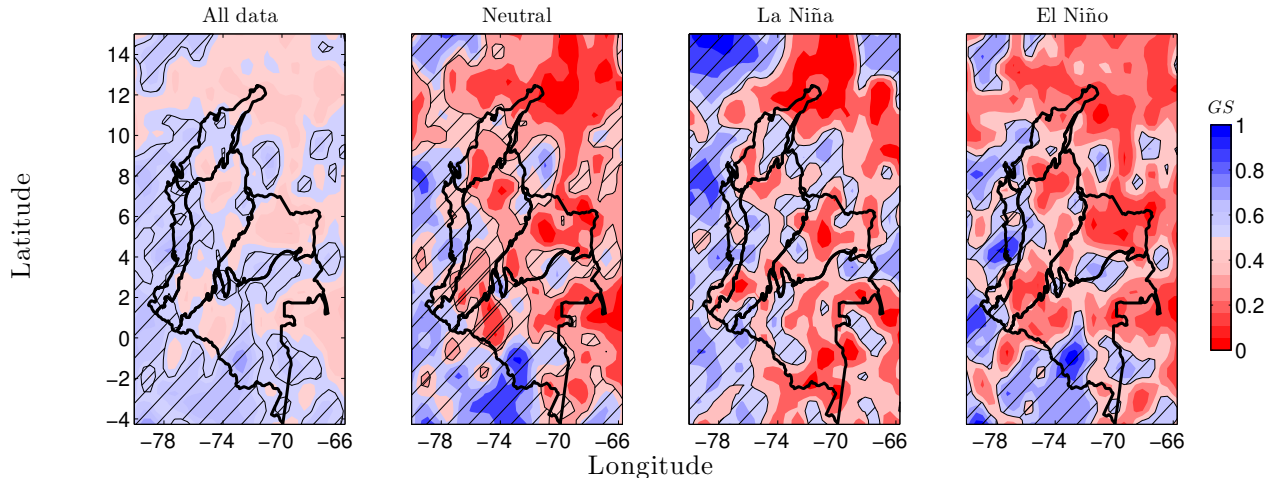

**Figure S1.** Generalized synchronization between SST gradient in the far-eastern Pacific and rainfall anomalies. Dataset No.1, period 1975-2006. The hatched contours indicates zones where the GS is significant at 5%.

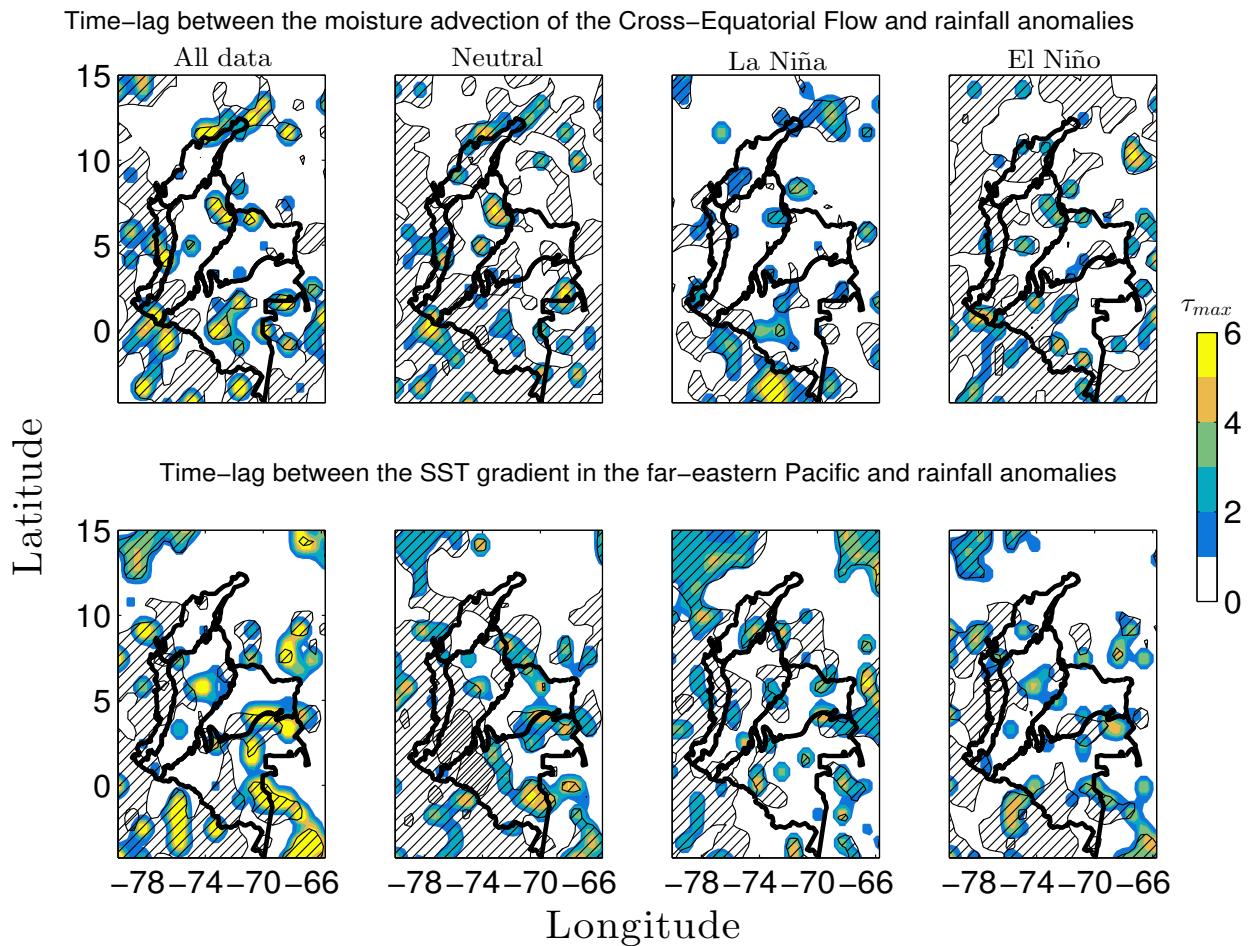

**Figure S2.** Time-lag in months between (top row) the moisture advection by the Cross-Equatorial Flow and rainfall anomalies and, (bottom row) SST gradient in the far-eastern Pacific and rainfall anomalies. Dataset No.1, period 1975-2006. The hatched contours indicates zones where the GS is significant at 5%.

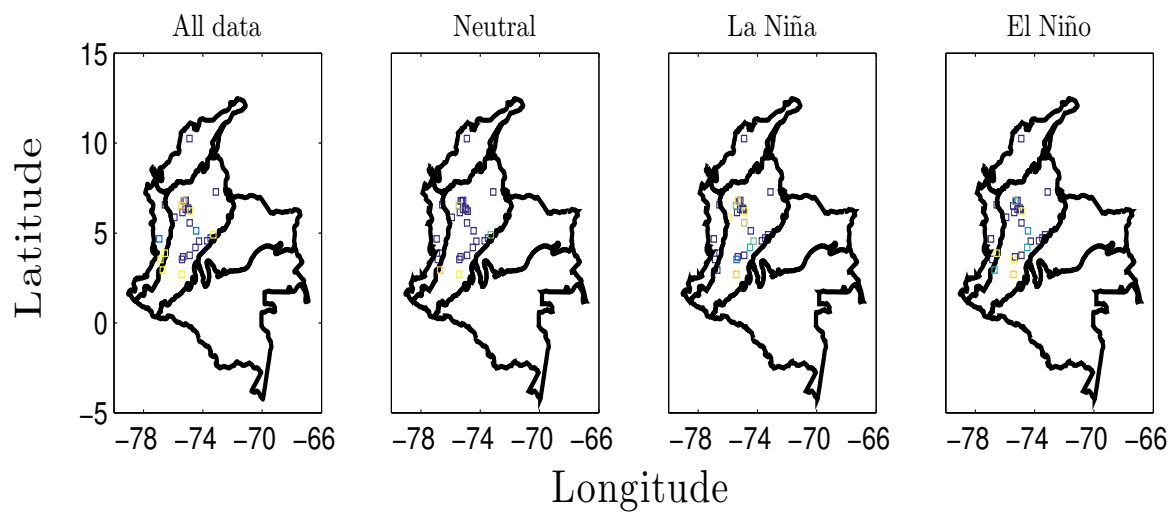

**Figure S3.** Time-lag in months between MEI and streamflows anomalies, period 1976-2013.

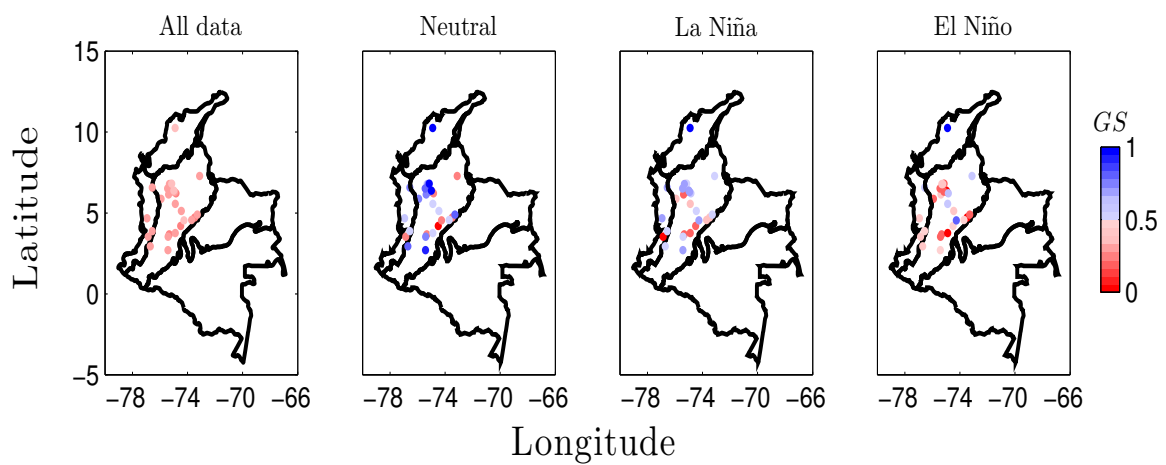

**Figure S4.** Generalized Synchronization Index between the Eastern Pacific (EP) index and river flow anomalies from the IDEAM and XM datasets, period 1976-2013.

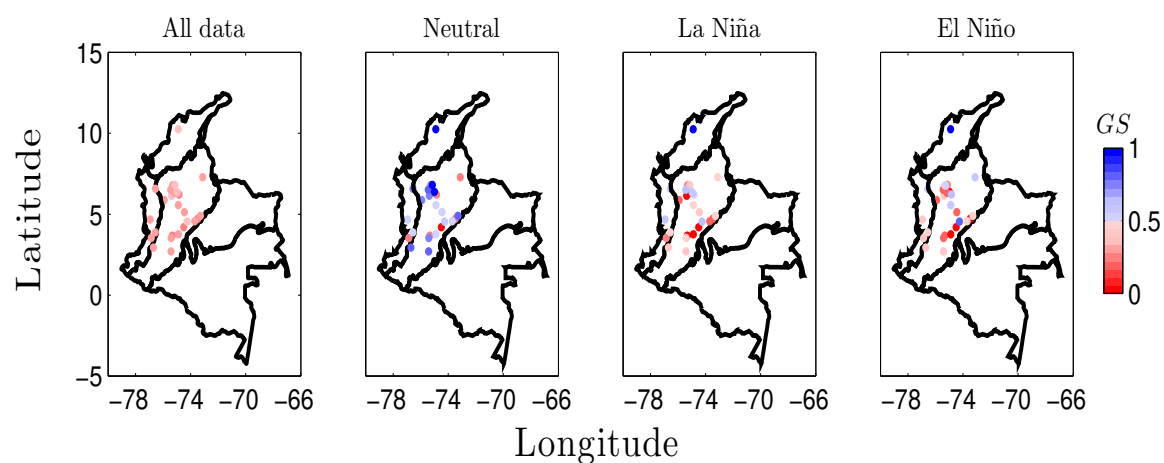

**Figure S5.** Generalized Synchronization Index between the Central Pacific (CP) index and river flow anomalies from the IDEAM and XM datasets, period 1976-2013.

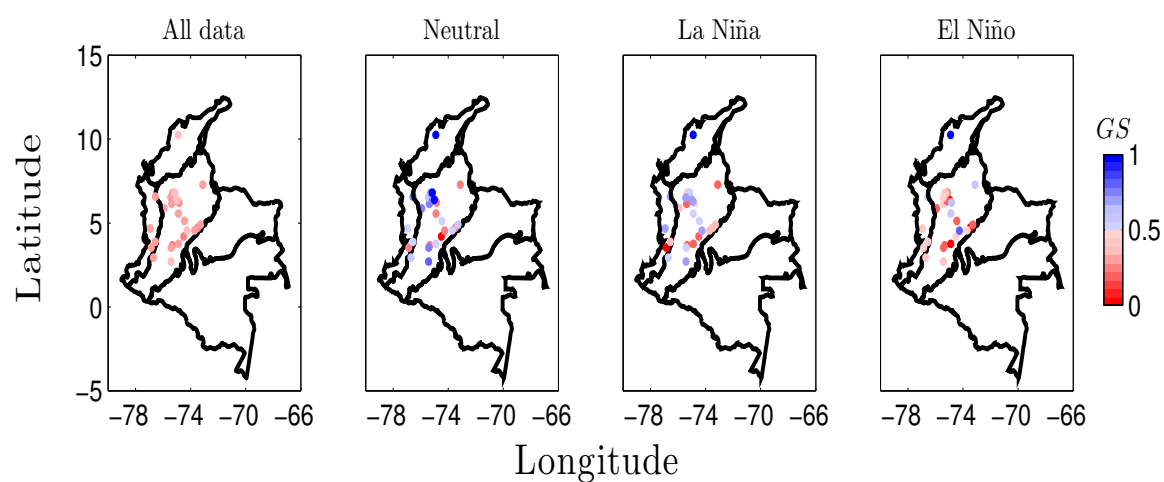

**Figure S6.** Generalized Synchronization Index between the Mixed-type index and river flow anomalies from the IDEAM and XM datasets, period 1976-2013.

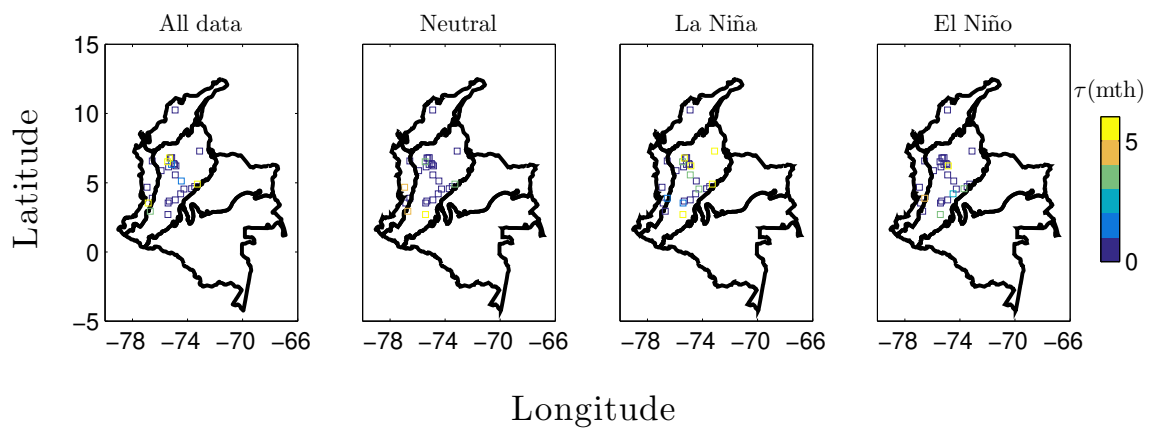

**Figure S7.** Timelags between the Eastern Pacific (EP) index and streamflow anomalies from the IDEAM and XM datasets, period 1976-2013.

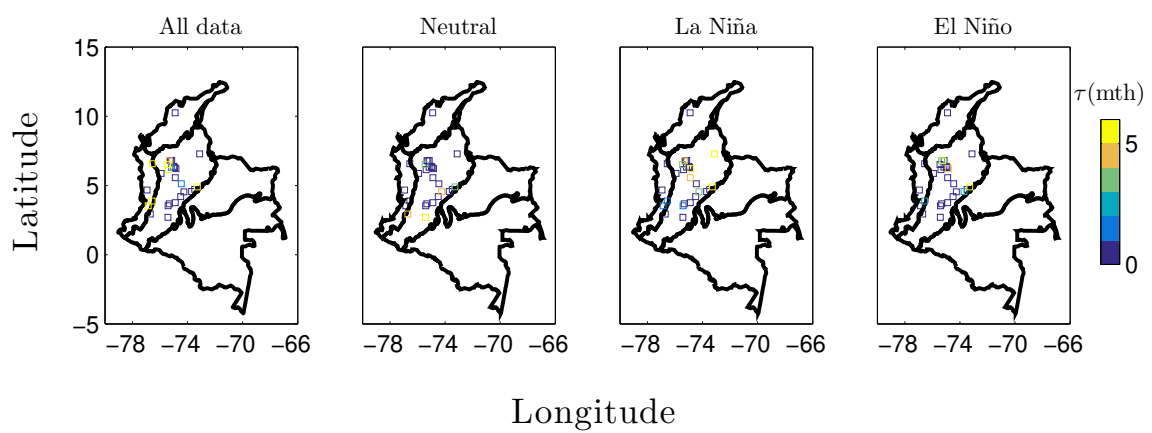

**Figure S8.** Timelags between the Central Pacific (CP) index and streamflow anomalies from the IDEAM and XM datasets, period 1976-2013.

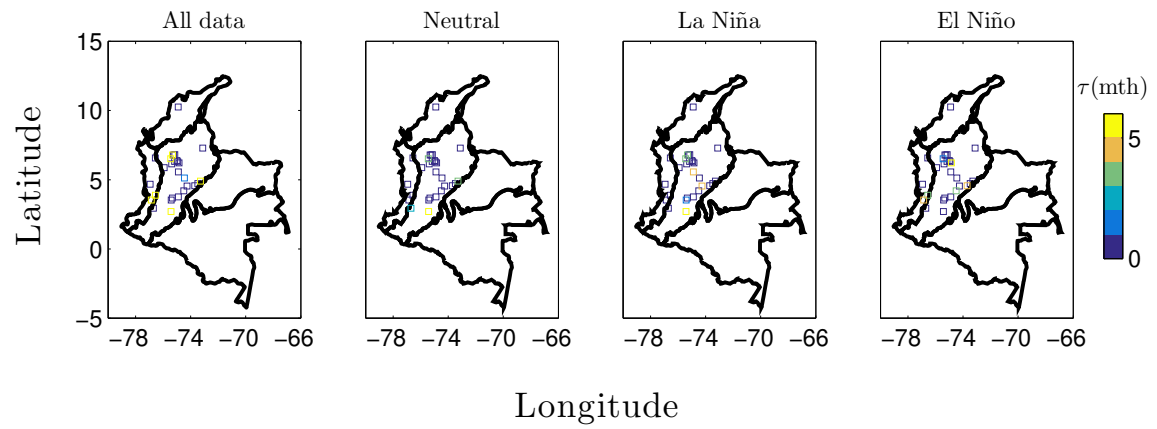

**Figure S9.** Timelags between the Mixed-Type El Niño index and streamflow anomalies from the IDEAM and XM datasets, period 1976-2013.

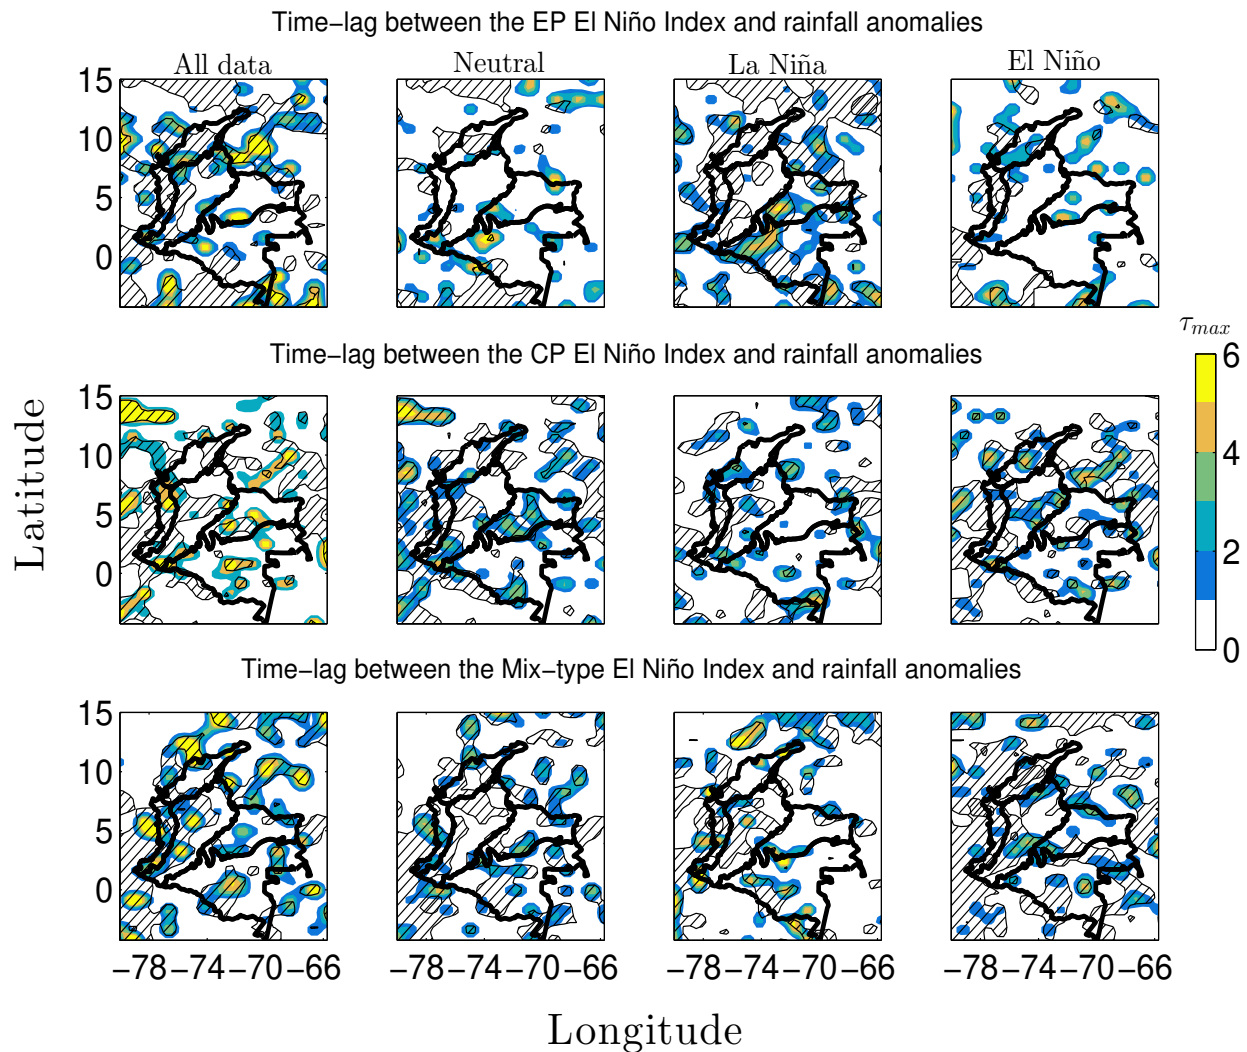

**Figure S10.** Time-lag in months between (top row) Eastern Pacific (EP) type of El Niño index and rainfall anomalies, (middle row) Central Pacific (CP) type of El Niño index and rainfall anomalies, and (bottom row) Mixed-type of El Niño index and rainfall anomalies. Dataset No.1, period 1975-2006. The hatched contours indicates zones where the GS is significant at 5%.

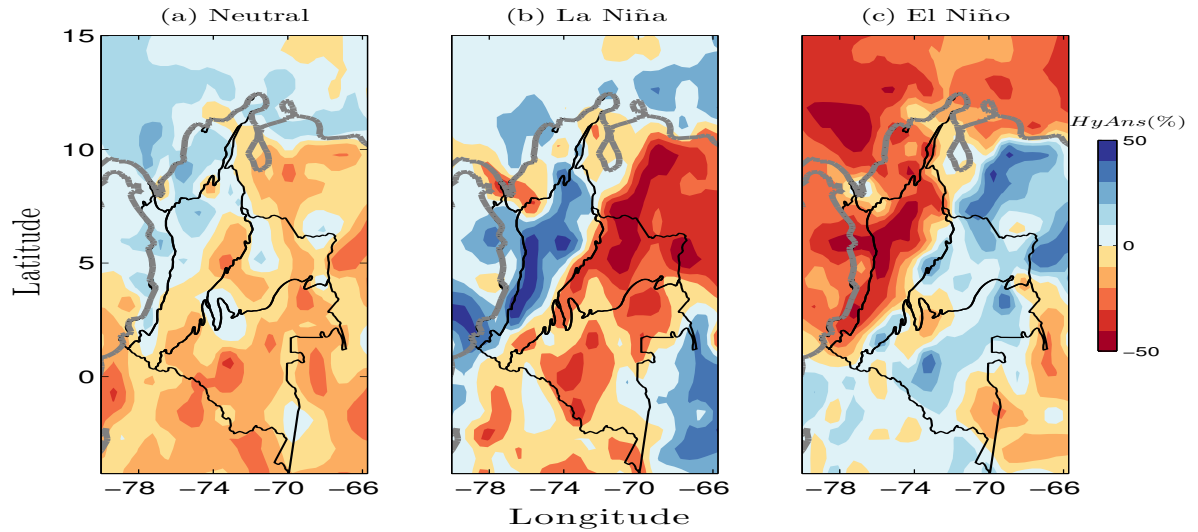

**Figure S11.** Composite average rainfall anomalies in Colombia during ENSO. Rainfall anomalies were calculated using F-Filtering of the annual cycle by moving averages, which is previously mentioned as the HyAns-FAC method. (gray line) northern South American coast line. (black line) Borders of the Colombia's natural regions.

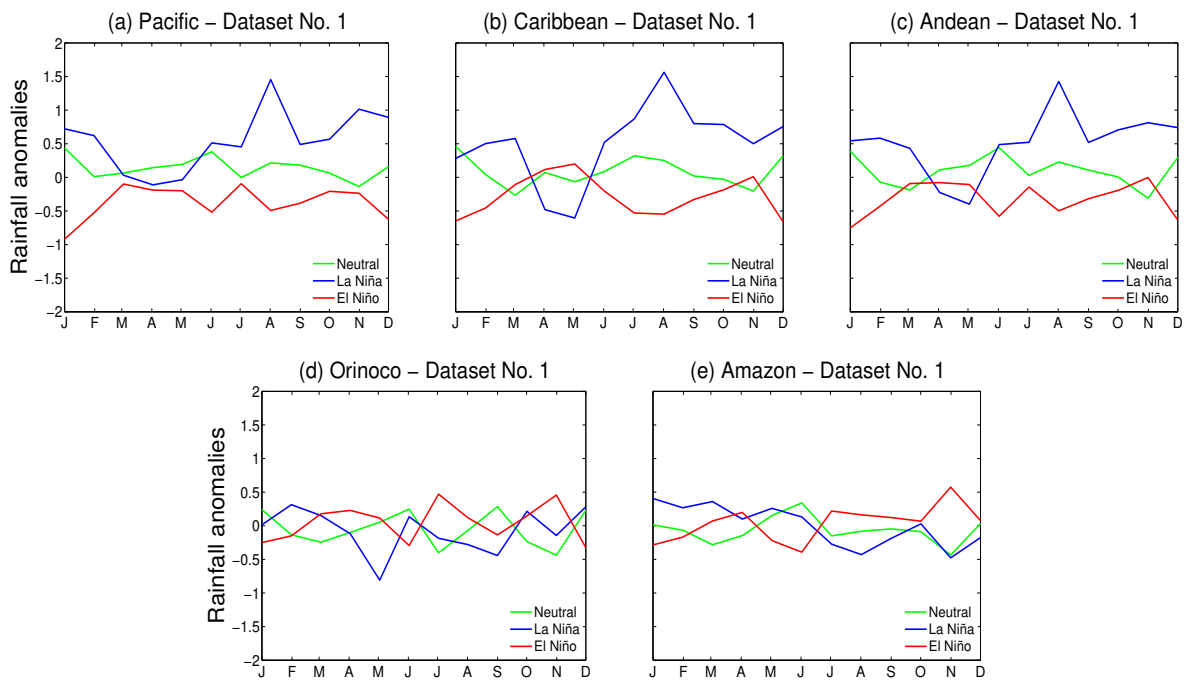

**Figure S12.** Annual cycle of rainfall anomalies averaged over the five natural regions (Pacific, Caribbean, Andean, Orinoco, and Andes) of Colombia during the phases of ENSO (La Niña, El Niño and Neutral) for Dataset No. 1, period 1975-2006.
